# Supplementary material for: The marine reservoir age of Greenland coastal waters
Source: Copernicus journal article supplement (doi:10.5194/gchron-2023-7), 2023-04-17
Supplement: Supplementary file 2 [file Supplementary Table 1.xlsx]

## Sheet: CLAMS_and_CALIB_all_zones2022R
SampleNumber (this study)	MapNo - Reservoir database (Reimer & Reimer 2001)	UniqueName	Zone	Museum Storage	Museum	Museums nr	Genus	Species	Feeding habit	Latitude decimal	Longitude decimal	Locality description from museum catalogues	Subregion	Museum catalogue - additional notes	Day of collection	Month of collection	Year of collection	Expedition	Water depth (m) from museum catalogues	Water depth (m) from GEBCO2020	Water depth combined (m)	14C Lab ID	F14C	F14C error	C14 age AMS	C14 age error	deltaR	deltaR_error	d13C (permille)	SeaIce (annual average 1850-1950)
68		New68	NEGreenland	Dry	SMNH	88318	Macoma	moesta	Deposit	70.45	-22.5833	Greenland 1899#29 - Scoresby Sound, Cape Stewart, 1 km off shore, E of Ryder's depot		Rather firm clay with some ooze, stones, shells and lots of algae and Laminaria			1899	Nathorst Grønlands Expedition 1899	-18		-18	AAR-27953	0.924192	0.00304149	633	26	18	26	2.45661	75.3
69		New69	NEGreenland	Dry	SMNH	6900	Thyasira		unknown	70.7167	-22.4833	Greenland 1899#33 - Greenland		Ooze (relatively loose)			1899	Nathorst Grønlands Expedition 1899	-70		-70	AAR-27941	0.907603	0.00261029	779	23	164	23	-4.98195	71.4
70		New70	NEGreenland	Dry	SMNH	36058	Yoldiella	solidula	Deposit	70.7167	-22.4833	Greenland 1899#33 - Greenland		Ooze (relatively loose)			1899	Nathorst Grønlands Expedition 1899	-70		-70	AAR-27946	0.918893	0.00431798	679	38	64	38	-0.358034	71.4
71		New71	NEGreenland	Dry	SMNH	6909	Thyasira		unknown	70.8333	-22.5167	Greenland 1899#30 - Scoresby Sound, Harry's inlet, N of NW Fame Island		Rather firm and very smooth clay			1899	Nathorst Grønlands Expedition 1899	-25		-25	AAR-27942	0.881904	0.00318577	1010	29	395	29	-4.75711	71.4
72		New72	NEGreenland	Dry	SMNH	87108	Serripes	groenlandicus	suspension	70.8333	-22.5167	Greenland 1899#32 - Greenland		Rather loose ooze, algae and Laminaria			1899	Nathorst Grønlands Expedition 1899	-9		-9	AAR-27951	0.929207	0.00383109	590	33	-25	33	1.49798	71.4
73		New73	NEGreenland	Dry	SMNH	88293	Macoma	loveni	Deposit	70.8333	-22.5167	Greenland 1899#30 - Scoresby Sound, Harry's inlet, N of NW Fame Island		Rather firm and very smooth clay			1899	Nathorst Grønlands Expedition 1899	-25		-25	AAR-27952	0.906604	0.00280029	788	25	173	25	3.73431	71.4
74		New74	NEGreenland	Dry	SMNH	88348	Macoma	moesta	Deposit	70.8333	-22.5167	Greenland 1899#30 - Scoresby Sound, Harry's inlet, N of NW Fame Island		Rather firm and very smooth clay			1899	Nathorst Grønlands Expedition 1899	-25		-25	AAR-27955	0.899084	0.00424608	855	38	240	38	1.24897	71.4
77		New77	NEGreenland	Dry	SMNH	6811	Thyasira	gouldi	unknown	72.75	-22.9333	Greenland 1899#39 - Greenland		Light yellow-brown rather loose ooze, also clay and a few stones			1899	Nathorst Grønlands Expedition 1899	-60		-60	AAR-27940	0.913164	0.00271492	730	24	115	24	-7.51768	91.9
78		New78	NEGreenland	Dry	SMNH	86556	Ciliatocardium	ciliatum	suspension	73.1	-27.2833	Greenland 1899#35 - K. Frans Joseph Fjord		Mud, sand, algae			1899	Nathorst Grønlands Expedition 1899	-9		-9	AAR-27950	0.928799	0.00407972	593	35	-22	35	-7.5139	85.1
81		New81	NEGreenland	Dry	SMNH	6917	Thyasira		unknown	73.25	-25.7	Greenland 1899#36 - K. Frans Joseph Fjord		Ooze, sand, stones			1899	Nathorst Grønlands Expedition 1899	-760		-760	AAR-27943	0.847274	0.00319252	1331	30	716	30	-10.7447	85.1
82		New82	NEGreenland	Dry	SMNH	36454	Thracia	devexa	unknown	73.2667	-23.25	SweArc1899#44 - K. Franz Joseph fjord, southern end of the shore, close to the mouth,1 km off shore		Mixed			1899	SweArc1899#44	-36		-36	AAR-27947	0.907691	0.00254672	778	23	163	23	6.04916	88.7
83		New83	NEGreenland	Dry	SMNH	36668	Thracia	septentrionalis	unknown	73.2667	-23.25	SweArc1899#44 - K. Franz Joseph fjord, southern end of the shore, close to the mouth,1 km off shore		Mixed			1899	SweArc1899#44	-36		-36	AAR-27948	0.803674	0.00274536	1756	27	1141	27	0.209987	88.7
84		New84	NEGreenland	Dry	SMNH	88320	Macoma	moesta	Deposit	73.2667	-23.25	SweArc1899#44 - K. Franz Joseph fjord, southern end of the shore, close to the mouth,1 km off shore		Mixed			1899	SweArc1899#44	-36		-36	AAR-27954	0.911315	0.00304462	746	27	131	27	1.82754	88.7
87		New87	NEGreenland	Dry	SMNH	56214	Arctinula	greenlandica	unknown	74.5	-18.6667	SwedArc1900#18 - southeast of Hvalrossön		Ooze and stones			1900	SwedArc1900#18	-100		-100	AAR-27949	0.919603	0.00300492	673	26	58	26	3.68942	92.1
88		New88	NEGreenland	Dry	SMNH	12995	Serripes	groenlandicus	suspension	74.5833	-18.3833	Greenland1899#20 - S of Little Pendulum Island, just W of southeastern point, 1,5-2 km off shore		Silt, mud and sand, a few algae			1899	Nathorst Grønlands Expedition 1899	-21		-21	AAR-27944	0.91509	0.00413113	713	36	98	36	0.98781	91.3
89		New89	NEGreenland	Dry	SMNH	16836	Colus	kroeyeri	predator	74.5833	-18.3833	Greenland1899#20 - S of Little Pendulum Island, just W of southeastern point, 1,5-2 km off shore		Silt, mud and sand, a few algae			1899	Nathorst Grønlands Expedition 1899	-21		-21	AAR-27956	0.922838	0.00297788	645	26	30	26	2.20798	91.3
90		New90	NEGreenland	Dry	SMNH	27404	Astarte	montagui	suspension	74.5833	-18.3833	Greenland1899#20 - S of Little Pendulum Island, just W of southeastern point, 1,5-2 km off shore		Silt, mud and sand, a few algae			1899	Nathorst Grønlands Expedition 1899	-21		-21	AAR-27945	0.925478	0.00325355	622	28	7	28	-1.46038	91.3
1		New1	NFL	Ethanol	SMNH	BIV-1013	Cardita	novangliae	unknown	46.2167	-51.7667	Newfoundland Grand Banks					1871	Ingegerd og Gladan 1871	-59		-59	AAR-36941	0.924846	0.00271053	628	24	-12	24		0.6
2		New2	NFL	Ethanol	SMNH	PROS-419	Margarita	cinera	Deposit	46.9333	-52.4667	Newfoundland Grand Banks					1871	Ingegerd og Gladan 1871	-91		-91	AAR-36966	0.941767	0.00265796	482	23	-158	23		2.5
3		New3	Labrador	Ethanol	NHMD	301855	Volutomitra	groenlandica	predator	55.0833	-57	ca 20 somil fra Hamilton Inlet. Labrador St.14			6	6	1928	Godthåb Expedition 1928	-314		-314	AAR-29763	0.933223	0.00304795	555	26	-50	26	4.06762	31.2
4		New4	Labrador	Ethanol	NHMD	301865	Admete	viridula	predator	55.0833	-57	Nær Labrador St14		Skraber	6	6	1928	Godthåb Expedition 1928	-314		-314	AAR-29770	0.931081	0.00270905	574	23	-31	23	8.24388	31.2
5		New5	Labrador	Ethanol	SMNH	BIV-237	Modiolaria	nigra	suspension	64.9333	-66.3	Baffin Bay		På stranden (Ebb)	12	10	1894	Ellis Nilsson 1894	0		0	AAR-30455	0.93052	0.00262036	578	23	-42	23		70.9
6		New6	Labrador	Ethanol	SMNH	PROS-1835	Bela	tenuicostata	predator	66.55	-61.8333						1894	Ellis Nilsson 1894	-15		-15	AAR-36970	0.916459	0.00293333	701	26	81	26		66
7		New7	NWBaffin	Ethanol	SMNH	BIV-2444	Nuculana	pernula	Deposit	71.95	-73.9333						1894	Ellis Nilsson 1894	-23		-23	AAR-29750	0.90029	0.0033559	844	30	224	30	5.77086	78
8		New8	NWBaffin	Ethanol	SMNH	BIV-214	Musculus	niger	suspension	71.95	-73.9333	Baffin Bay					1894	Ellis Nilsson 1894	-41		-41	AAR-29743	0.912313	0.00318697	737	28	117	28	6.79228	78
9		New9	NWBaffin	Ethanol	SMNH	BIV-128	Similipecten	greenlandicus	unknown	72.1333	-74.3333	Canada, Baffin Bay					1894	Ellis Nilsson 1894	-101		-101	AAR-29742	0.900746	0.00347621	840	31	220	31	6.40524	78.1
10		New10	NWBaffin	Ethanol	SMNH	BIV-228	Musculus	niger	suspension	72.1333	-74.3333	Baffin Bay					1894	Ellis Nilsson 1894	-55		-55	AAR-29744	0.90071	0.00288979	840	26	220	26	6.5181	78.1
11		New11	NWBaffin	Ethanol	SMNH	BIV-2442	Nuculana	pernula	Deposit	72.1333	-74.3333						1894	Ellis Nilsson 1894	-55		-55	AAR-29648	0.897844	0.00302673	866	27	246	27	7.32389	78.1
12		New12	NWBaffin	Ethanol	SMNH	OPI-776	Cylichnoides	scalptus	predator	72.6333	-77.1667						1894	Ellis Nilsson 1894	-30		-30	AAR-29757	0.906411	0.00282384	789	25	169	25	6.8041	82.2
13		New13	NWBaffin	Ethanol	SMNH	BIV-2443	Nuculana	pernula	Deposit	72.6333	-77.1667						1894	Ellis Nilsson 1894	-30		-30	AAR-29749	0.901828	0.00314066	830	28	210	28	4.92732	82.2
14		New14	NWBaffin	Ethanol	SMNH	BIV-576	Pronucula	tenuis	suspension	71.95	-78.9333	Baffin Bay					1894	Ellis Nilsson 1894	-64		-64	AAR-29745	0.895428	0.00300505	887	27	267	27	8.23889	84.1
15		New15	NWBaffin	Ethanol	SMNH	BIV-2015	Tellina	calcarea	Deposit	73.7167	-78.8						1894	Ellis Nilsson 1894	-20		-20	AAR-30472	0.864867	0.00272145	1166	25	546	25		75.5
16		New16	Nares	Ethanol	NHMD	301860	Pronucula	tenuis	suspension	76.1333	-80.8833	st 116		skraber	17	8	1928	Godthåb Expedition 1928	-80		-80	AAR-29766	0.925246	0.002867	624	25	20	25	8.15658	81.1
17		New17	Nares	Ethanol	NHMD	301896	Macoma	calcarea	Deposit	76.1333	-80.8833	St 116			17	8	1928	Godthåb Expedition 1928	-80		-80	AAR-29801	0.916797	0.0027684	698	24	94	24	2.36436	81.1
18		New18	Nares	Ethanol	NHMD	301899	Astarte	crenata	suspension	76.1333	-80.8833	st 116		Skraber	17	8	1928	Godthåb Expedition 1928	-80		-80	AAR-29804	0.92505	0.00262371	626	23	22	23	3.81121	81.1
19		New19	Nares	Ethanol	NHMD	301868	Musculus	discors	suspension	76.6667	-76.3333	St 114		Skraber	16	8	1928	Godthåb Expedition 1928	-85		-85	AAR-29773	0.929719	0.00280883	585	24	-20	24	6.99388	75.8
20		New20	Nares	Ethanol	NHMD	301892	Astarte	montagui	suspension	76.6667	-76.3333	st 114		skraber	16	8	1928	Godthåb Expedition 1928	-85		-85	AAR-29797	0.918459	0.00255366	683	22	79	22	2.73413	75.8
21		New21	Nares	Ethanol	NHMD	301897	Macoma	calcarea	Deposit	76.6667	-76.3333	st 114		skraber	16	8	1928	Godthåb Expedition 1928	-85		-85	AAR-29802	0.917817	0.00317663	689	28	85	28	1.02128	75.8
22		New22	NWGreenland	Ethanol	NHMD	301891	Astarte	crenata	suspension	77.0833	-71.2167	St 87			4	8	1928	Godthåb Expedition 1928	-790		-790	AAR-29796	0.933418	0.0028121	553	24	-52	24	1.67532	73.1
23		New23	NWGreenland	Ethanol	NHMD	301879	Margarites	groenlandicus	unknown	76.4167	-69.6667	St 107		Skraber	15	8	1928	Godthåb Expedition 1928	-160		-160	AAR-29784	0.93513	0.00289144	539	25	-66	25	4.23789	71.6
24		New24	NWGreenland	Ethanol	NHMD	301898	Macoma	calcarea	Deposit	76.4167	-69.6333	St 107		Skraber	15	8	1928	Godthåb Expedition 1928	-165		-165	AAR-29803	0.929404	0.00274732	588	24	-17	24	3.49887	71.6
25		New25	NWGreenland	Ethanol	SMNH	PROS-1526	Adnite	viridula	predator	76.15	-68.4667						1894	Ellis Nilsson 1894	-40		-40	AAR-36968	0.930825	0.00234609	576	20	-29	20		77.5
26		New26	NWGreenland	Ethanol	NHMD	301890	Astarte	crenata	suspension	75.4333	-62.4333	st 77		ottertrawl	31	7	1928	Godthåb Expedition 1928	-820		-820	AAR-29795	0.91767	0.0028648	690	25	86	25	3.7294	74.8
27		New27	NWGreenland	Ethanol	NHMD	301900	Astarte	crenata	suspension	74.8667	-62.2	st73		Sigsbeetrawl	30	7	1928	Godthåb Expedition 1928	-450		-450	AAR-29805	0.936004	0.00297305	531	26	-74	26	2.23364	73.7
28		New28	NWGreenland	Ethanol	NHMD	301881	Astarte	crenata	suspension	74.6167	-62.85	W. Greenland			30	7	1928	Godthåb Expedition 1928	-275		-275	AAR-29786	0.932555	0.00297125	561	26	-44	26	2.92305	73.9
29		New29	NWGreenland	Ethanol	NHMD	301893	Macoma	calcarea	Deposit	73.9167	-56.6667	Haunen pa Vestsiden af Kugdller Korsuit-oen		Skr. trawl	20	8	1931		-20		-20	AAR-29798	0.938248	0.00326847	512	28	-92	28	0.674545	61.5
30		New30	NWGreenland	Ethanol	NHMD	301886	Astarte	crenata	suspension	73.2	-58.1333	st 64			28	7	1928	Godthåb Expedition 1928	-850		-850	AAR-29791	0.928324	0.00307186	597	27	-8	27	3.95595	59.5
31		New31	NWGreenland	Ethanol	NHMD	301883	Macoma	calcarea	Deposit	72.5333	-57.6	st 61			21	7	1928	Godthåb Expedition 1928	-190		-190	AAR-29788	0.92956	0.00373122	587	32	-18	32	2.00843	53.4
32		New32	SGreenland	Ethanol	SMNH	BIV-2013	Tellina	calcarea	Deposit	65.1833	-53.55	Davis Strait					1871	Ingegerd og Gladan 1871	-88		-88	AAR-30471	0.935337	0.00282917	537	24	-103	24		7.2
33		New33	NWGreenland	Ethanol	SMNH	BIV-354	Dacrydium	vitreum	unknown	72.0667	-59.8333	Baffin Bay					1871	Ingegerd og Gladan 1871	-409		-409	AAR-36935	0.929897	0.0048606	584	42	-56	42		62.4
34		New34	NWGreenland	Ethanol	SMNH	BIV-2146	Lyonsiella	abyssicola	unknown	72.0667	-59.8333	Baffin Bay					1871	Ingegerd og Gladan 1871	-415		-415	AAR-29748	0.916933	0.00348537	697	31	57	31	-2.19368	62.4
35		New35	NWGreenland	Ethanol	SMNH	BIV-2211	Cuspidaria	glacialis	predator	72.0667	-59.8333	Baffin Bay					1871	Ingegerd og Gladan 1871	-415		-415	AAR-29646	0.93222	0.00308514	564	27	-76	27	-1.65341	62.4
36		New36	NWGreenland	Ethanol	NHMD	301861	Pronucula	tenuis	suspension	71.35	-54.4833	st 139			3	9	1928	Godthåb Expedition 1928	-47		-47	AAR-29767	0.938294	0.00312169	512	27	-93	27	8.25671	46.9
37		New37	NWGreenland	Ethanol	NHMD	301876	Buccinum	scalariforme	predator	71.35	-54.4833	st139		ler	3	9	1928	Godthåb Expedition 1928	-47		-47	AAR-29781	0.935823	0.00332564	533	29	-72	29	2.99492	46.9
38		New38	NWGreenland	Ethanol	NHMD	301884	Macoma	calcarea	Deposit	71.35	-54.4833	st 139			3	9	1928	Godthåb Expedition 1928	-47		-47	AAR-29789	0.928994	0.00328071	592	28	-13	28	3.19368	46.9
39		New39	NWGreenland	Ethanol	NHMD	301888	Ciliatocardium	ciliatum	suspension	71.35	-54.4833	st139 Ler Sigsbeetrawl			3	9	1928	Godthåb Expedition 1928	-47		-47	AAR-29793	0.933808	0.00285481	550	25	-55	25	1.53739	46.9
40		New40	NWGreenland	Ethanol	SMNH	BIV-791	Portlandia	intermedia	Deposit	71.1667	-58.9333	Baffin Bay					1871	Ingegerd og Gladan 1871	-364		-364	AAR-30463	0.932625	0.00260646	560	22	-80	22		56.4
41		New41	NWGreenland	Ethanol	SMNH	BIV-790	Portlandia	intermedia	Deposit	70	-58.6333	Baffin Bay					1871	Ingegerd og Gladan 1871	-364		-364	AAR-30462	0.923552	0.00269627	639	23	-1	23		56.8
42		New42	NWGreenland	Ethanol	NHMD	301850	Stenosemus	albus	unknown	69.6833	-55.0167				13	7	1928	Godthåb Expedition 1928	-70		-70	AAR-29762	0.942642	0.00379383	474	32	-131	32	5.36804	38.2
43		New43	NWGreenland	Ethanol	NHMD	301859	Pronucula	tenuis	suspension	69.6833	-55.5	Station 48			13	7	1928	Godthåb Expedition 1928	-120		-120	AAR-29765	0.943325	0.00314724	469	27	-136	27	4.98582	38.4
44		New44	NWGreenland	Ethanol	SMNH	34902	Tachyrhynchus	erosus	unknown	69.2833	-52.8333	Tjalfe#117-118, disco bay					1908	Tjalfe	-410		-410	AAR-29761	0.924171	0.00307595	633	27	24	27	4.40696	30.8
45		New45	NWGreenland	Ethanol	NHMD	301885	Astarte	crenata	suspension	68.2833	-58.2333	St 160.		G. Thorson	12	9	1928	Godthåb Expedition 1928	-410		-410	AAR-29790	0.933963	0.00295986	549	25	-56	25	5.24584	50.5
46		New46	NWGreenland	Ethanol	SMNH	BIV-874	Cardium	ciliatum	suspension	68.2333	-54.1167	Baffin Bay					1871	Ingegerd og Gladan 1871	-240		-240	AAR-30464	0.93427	0.00267403	546	23	-94	23		28.5
47		New47	NWGreenland	Ethanol	SMNH	BIV-2842	Astarte	montagui	suspension	68	-54.5	Davis strait					1870	SwedArc1870	-36		-36	AAR-29753	0.943332	0.00307069	469	26	-172	26	5.04515	28.1
48		New48	NWGreenland	Ethanol	NHMD	301867	Crenella	decussata	unknown	68	-54.8333	Islands Falk st 8			16	8	1926	Islands Falk		-25	-25	AAR-29772	0.937125	0.00269041	522	23	-83	23	6.4152	29.2
49		New49	NWGreenland	Ethanol	NHMD	301864	Admete	viridula	predator	66.5833	-56.6333	N. Atlantic St.32			11	7	1895	The Danish Ingolf Expedition 1895	-599		-599	AAR-29769	0.928895	0.00275925	593	24	-26	24	8.80498	32.9
50		New50	NWGreenland	Ethanol	NHMD	301866	Admete	viridula	predator	66.5833	-56.6333	N. Atlantic St.32			11	7	1895	The Danish Ingolf Expedition 1895	-599		-599	AAR-29771	0.930845	0.00360279	576	31	-43	31	7.96054	32.9
51		New51	NWGreenland	Ethanol	NHMD	301874	Cylichna	alba	predator	66.5833	-56.6333	st 32			11	7	1895	The Danish Ingolf Expedition 1895	-599		-599	AAR-29779	0.934229	0.00319701	547	27	-72	27	3.89837	32.9
52		New52	NWGreenland	Ethanol	NHMD	301887	Astarte	crenata	suspension	66.5833	-56.6333	st32			11	7	1895	The Danish Ingolf Expedition 1895	-599		-599	AAR-29792	0.929555	0.00276474	587	24	-32	24	5.43659	32.9
53		New53	SGreenland	Ethanol	NHMD	301875	Buccinum	finmarkianum	predator	65.5667	-54.5167	st29			5	7	1895	The Danish Ingolf Expedition 1895	-128		-128	AAR-29780	0.935586	0.00336735	535	29	-87	29	0.383491	11.8
54		New54	SGreenland	Ethanol	NHMD	301875	Buccinum	finmarkianum	predator	65.5667	-54.5167	st29			5	7	1895	The Danish Ingolf Expedition 1895	-128		-128	AAR-29780	0.938439	0.00350537	510	30	-109	30	-2.0236	11.8
55		New55	SGreenland	Ethanol	NHMD	301894	Macoma	calcarea	Deposit	64.0333	-52.4167	fyllas banke			27	7	1926		-85		-85	AAR-29799	0.926116	0.00321365	617	28	13	28	-0.00422932	3.5
56		New56	SGreenland	Ethanol	SMNH	BIV-363	Crenella	decussata	unknown	63.7833	-52.4333	Davis Strait					1871	Ingegerd og Gladan 1871	-64		-64	AAR-30460	0.935742	0.00292161	534	25	-106	25		3.2
57		New57	SGreenland	Ethanol	SMNH	BIV-2348	Mya	truncata	suspension	63.7833	-52.4333	Davis strait					1871	Ingegerd og Gladan 1871	-64		-64	AAR-29647	0.936833	0.00323503	524	28	-116	28	3.20049	3.2
58		New58	SGreenland	Ethanol	SMNH	106277	Ariadnaria	borealis	suspension	63.7833	-52.4333	SwedArc1871#05, davis strait, archipelago					1871	Ingegerd og Gladan 1871	-64		-64	AAR-29759	0.931774	0.00312825	568	27	-72	27	7.78745	3.2
59		New59	SGreenland	Ethanol	SMNH	BIV-1038	Astarte	semisulcata	suspension	63.5833	-52.85	Davis Strait					1871	Ingegerd og Gladan 1871	-79		-79	AAR-30467	0.93503	0.0024564	540	21	-100	21		2.9
60		New60	SGreenland	Ethanol	SMNH	106160	Margarites	vahlii	Deposit	65.4167	-52.8333	SwedArc1870#1899, sukkertoppen, stones					1870	SwedArc1870	-32		-32	AAR-29760	0.932679	0.00309952	560	27	-81	27	5.65047	7.9
61		New61		Ethanol	NHMD	301858	Buccinum	abyssorum	predator	62.1	-55	Station 180			6	10	1928	Godthåb Expedition 1928	-2750		-2750	AAR-29764	0.944799	0.00322095	456	27	-149	27	3.10185	3.7
62		New62	SGreenland	Ethanol	SMNH	BIV-2797	Serripes	groenlandicus	suspension	61.1667	-48.4	South Greenland, Arsukfjord					1865	Amondsen		-127	-127	AAR-29752	0.931542	0.00277974	570	24	-74	24	4.62555	3.8
63		New63	SGreenland	Ethanol	SMNH	BIV-131	Similipecten	greenlandicus	unknown	65.6667	-35.5333	Greenland, east coast					1883	Sofia Exp.	-58		-58	AAR-29741	0.93047	0.00282853	579	24	-52	24	7.2816	44.8
64		New64		Ethanol	NHMD	301889	Astarte	crenata	suspension	66.8333	-20.0333	st 128			2	8	1896	The Danish Ingolf Expedition 1895	-365		-365	AAR-29794	0.930289	0.0028739	580	25	-38	25	2.51851	7.7
65		New65		Ethanol	NHMD	301870	Naticidae	Naticidae	predator	66.3833	-7.4167	st 104 N. Atlantic			11	7	1896	The Danish Ingolf Expedition 1895	-1802		-1802	AAR-29775	0.931594	0.00319228	569	28	-49	28	5.03163	0
66		New66		Ethanol	NHMD	301869	Naticidae	Naticidae	predator	69.2167	-8.3833	st. 117 N Atlantic dybhav			24	7	1896	The Danish Ingolf Expedition 1895	-1889		-1889	AAR-29774	0.927896	0.00275204	601	24	-17	24	5.56249	1.2
67		New67	NEGreenland	Ethanol	NHMD	301871	Margarites	groenlandicus	unknown	70.45	-20.3667	St. 29. Scoresby Sund, Cap levant?		Slam stenar algar			1899	Nathorst Grønlands Expedition 1899	-15		-15	AAR-29776	0.935278	0.00302599	538	26	-77	26	4.07223	69.3
75		New75		Ethanol	SMNH	BIV-1322	Pecten	fragilis	unknown	72.7	-14.8167	Atlantic					1900	Kolthoff Zoological Expedition 1900	-2000		-2000	AAR-30469	0.928761	0.00235842	594	20	-21	20		57.6
76		New76	NEGreenland	Ethanol	NHMD	301880	Hiatella	arctica	suspension	72.7167	-26.6333				23	8	1899	Nathorst Grønlands Expedition 1899	-45		-45	AAR-29785	0.931241	0.00309424	572	27	-43	27	1.97528	85.1
79		New79	NEGreenland	Ethanol	NHMD	301878	Margarites	groenlandicus	unknown	73.1	-27.2833	St 35 Kaiser Frans Joseph - Fjord		Dy med sand o alger			1899	Nathorst Grønlands Expedition 1899	-5		-5	AAR-29783	0.926236	0.00348276	616	30	1	30	1.0596	85.1
80		New80	NEGreenland	Ethanol	NHMD	301895	Macoma	calcarea	Deposit	73.1	-27.2833	kaiser frans joseph fjord		sand and algaea	12	8	1899	Nathorst Grønlands Expedition 1899	-6		-6	AAR-29800	0.929594	0.00360952	586	31	-29	31	-2.13425	85.1
85		New85	NEGreenland	Ethanol	NHMD	301873	Margarites	groenlandicus	unknown	73.4333	-21.2167	St. 23 Cap Benett			19	7	1899	Nathorst Grønlands Expedition 1899	-10		-10	AAR-29778	0.930859	0.00275597	576	24	-39	24	3.74086	91.6
86		New86	NEGreenland	Ethanol	NHMD	301882	Hiatella	arctica	suspension	74.1667	-20.3333	St. 21 S.O fr. Clavening-on		Slam, mycket skab o smasten			1899	Nathorst Grønlands Expedition 1899	-30		-30	AAR-29787	0.920636	0.00439022	664	38	49	38	1.003	91.4
91		New91	NEGreenland	Ethanol	NHMD	301872	Margarites	groenlandicus	unknown	74.5833	-18.3833	St. 20 F. om Lilla Pendulum Øn		Sandigt slam; alger			1899	Nathorst Grønlands Expedition 1899	-20		-20	AAR-29777	0.923165	0.00302948	642	26	27	26	7.49464	91.3
92		New92	NEGreenland	Ethanol	SMNH	PROS-341	Margarita	groenlandica	Deposit	75.9167	-19.3333	East Greenland					1900	Kolthoff Zoological Expedition 1900	-150		-150	AAR-36964	0.937798	0.00256085	516	22	-99	22		95.5
	9	Old9	Nares	Ethanol			Astarte	borealis	suspension	78.75	-74.92	Rice Strait, Smith Sound					1898			572		T-1544			690	70	75	70	-1.1	87.6
	11	Old11	Nares	Ethanol			Astarte	borealis	suspension	76.5	-84.5	Havnefjorden, Jones Sound					1899			301		T-1542			720	70	106	70	-0.8	86.1
	20	Old20	NEGreenland	Ethanol					unknown	74.38	-19.27	S of L. Penduluisoen and SE of Clavering					1899			149		Lu-0650			591	38	-23	38		90.4
	21	Old21	NEGreenland	Ethanol					unknown	73.47	-21.5	Mackenziebugt, NE Greenland					1900			-30	-30	Lu-0609			650	47	37	47		91.6
	22	Old22	NEGreenland	Ethanol					unknown	73.47	-21.5	Mackenziebugt, NE Greenland					1900			-30	-30	Lu-0610			620	54	7	54		91.6
	23	Old23	NEGreenland	Ethanol					unknown	70.83	-22.55	Fame Qer, Scoresby Sund, NE Greenland					1899			-35	-35	Lu-0643			641	39	27	39		71.4
	25	Old25	NEGreenland	Ethanol			Astarte	borealis	suspension	69.42	-24.08	Kap Dalton					1900			145		K-340			593	70	-20	70		67.7
	26	Old26	NEGreenland	Ethanol			Timoclea	cochinensis	suspension	70.45	-22.23	Kap Hope					1933			-41	-41	K-341			635	70	31	70		75.1
	27	Old27	NEGreenland	Ethanol			Astarte	borealis	suspension	70.82	-22.48	Hurry Inlet					1933			4		K-342			488	70	-116	70		71.4
	28	Old28	NEGreenland	Ethanol			Hiatella	arctica	suspension	71.13	-25.28	Bjorneoerne					1933			-95	-95	K-343			439	70	-165	70		85.1
	29	Old29	NEGreenland	Ethanol			Hiatella	arctica	suspension	70.45	-26.23	Hekla Havn					1892			-26	-26	K-344			503	40	-119	40		81.2
	30	Old30	NEGreenland	Ethanol			Hiatella	arctica	suspension	70.47	-27.13	Hekla Havn					1933			-1087	-1087	K-345			553	70	-51	70		81.2
	31	Old31	NEGreenland	Ethanol			Mya	truncata	suspension	76.75	-18.73	Danmarkshavn (depth up to ten fathoms)					1907			-6	-6	K-353			612	60	3	60		94.8
	33	Old33	NFL	Ethanol			Melanogrammus	aeglefinus	unknown	45	-55	Canadian East Coast					1951			-645	-645	Beta- AMS se			564	24	-39	24		0
	34	Old34	SGreenland	Ethanol			Mytilus	edulis	suspension	64.2	-51.75	Godthab, Greenland					1887			-375	-375	K-336			596	84	-31	84		3.5
	35	Old35	NWGreenland	Ethanol			Mytilus	edulis	suspension	69.22	-51.13	Jacobshavn, Greenland					1898			-90	-90	K-337			423	99	-192	99		41.8
	36	Old36	NWGreenland	Ethanol			Mytilus	edulis	suspension	69.25	-53.5	Disco, Greenland					1902			2		K-338			355	98	-257	98		30.7
	37	Old37	NWGreenland	Ethanol			Mytilus	edulis	suspension	69.68	-52	Mudderbugten, Disco, Greenland					1906			5		K-339			528	84	-81	84		40.7
	38	Old38	NWGreenland	Ethanol			Mytilus	edulis	suspension	72.37	-54.73	Proven harvour					1936			37		K-381			416	46	-187	46		54.4
	39	Old39	NWGreenland	Ethanol			Mytilus	edulis	suspension	72.78	-56.17	Upernavik					1936			-31	-31	K-382			436	46	-167	46		54.3
	40	Old40	NWGreenland	Ethanol			Mytilus	edulis	suspension	76.57	-68.8	Thule					1940			2		K-383			433	59	-170	59		71.6
	665	Old665	NWGreenland	Ethanol			Pagophilus	groenlandicus	unknown	69.5	-52	N.or W. Greenland					1886			-152	-152	K-346			543	51	-85	51		36.4
	666	Old666	NWGreenland	Ethanol			Odobenus	rosmarus	unknown	76.55	-68.77	Thule, Greenland					1915			47		K-347			640	52	34	52		71.6
	667	Old667	NEGreenland	Ethanol			Ursus	maritimus	unknown	68.35	-28.73	Kap Rink, E. Greenland					1932			-12	-12	K-348			483	51	-121	51		57.4
	669	Old669	SGreenland	Ethanol			Homo	sapiens	unknown	65.65	-36.88	Skjoldungen, E. Greenland					1750			0	0	K-350			709	69	-22	69		48.6
	670	Old670	SGreenland	Ethanol			Homo	sapiens	unknown	63.27	-41.12	Angmagssalik, E. Greenland					1750			-402	-402	K-351			699	51	-32	51		29.1
	671	Old671	NEGreenland	Ethanol			Ursus	maritimus	unknown	68.42	-28.52	Kap Stephensen, E. Greenland					1932			-5	-5	Lu-779			515	45	-89	45		60.3
	724	Old724	Nares	Ethanol			Astarte	borealis	suspension	78.76	-74.73	Rice Strait, NU	Arctic Ocean Islands				1898			29		GSC-1916			780	25	165	25	0.9	87.6
	725	Old725	Nares	Ethanol			Astarte	borealis	suspension	76.5	-83.92	Ellesmere Is., NU	Arctic Ocean Islands				1899			29		GSC-1920			800	30	186	30	1	85.9
	726	Old726	Nares	Ethanol			Balanus	balanus	suspension	76.67	-76.33	Ellesmere Is., NU	Arctic Ocean Islands				1928			-78	-78	GSC-2449			730	70	126	70	2.1	75.8
	728	Old728	Nares	Ethanol			Balanus	crenatus	suspension	78.76	-74.73	Rice Strait, NU	Arctic Ocean Islands				1898			29		GSC-2672			640	50	25	50	1.7	87.6
	729	Old729	Nares	Ethanol			Astarte	montagui	suspension	76.67	-76.33	Ellesmere Is., NU	Arctic Ocean Islands				1928			-78	-78	GSC-2812			600	60	-4	60	1	75.8
	730	Old730	Nares	Ethanol			Astarte	borealis	suspension	76.21	-81	Craig Hbr, NU	Arctic Ocean Islands				1953			75		TO-8043			660	80	57	80	1.4	82.7
	743	Old743	NFL	Ethanol			Chlamys	islandica	suspension	46.53	-51.53	south coast of NF	Atlantic Coast Cape Cod North				1951			-86	-86	CAMS-33354			600	50	-3	50	1.86	0.8
	749	Old749	NFL	Ethanol			Astarte	borealis	suspension	46	-56	St. Pierre, NF	Atlantic Coast Cape Cod North				1908			-65	-65	CAMS-64253			630	30	22	30	2	0
	753	Old753	NFL	Ethanol			Mya	truncata	suspension	45.5	-50.5	Grand Bank, NF	Atlantic Coast Cape Cod North				1954			-69	-69	CAMS-65809			490	40	-113	40	2.46	0.2
	781	Old781	Labrador	Ethanol			Hiatella	arctica	suspension	62.83	-66.58	Frobisher Bay, NU	Baffin Bay				1953			-191	-191	CAMS-57299			600	40	-3	40	0.9	68
	782	Old782	Labrador	Ethanol			Musculus	discors	suspension	66.13	-65.67	Pangnirtung, NU	Baffin Bay				1953			233		CAMS-57300			680	40	77	40	0.9	71.3
	783	Old783	Labrador	Ethanol			Hiatella	arctica	suspension	62.83	-66.58	Frobisher Bay, NU	Baffin Bay				1953			-191	-191	CAMS-57302			660	40	57	40	1.9	68
	784	Old784	Labrador	Ethanol			Musculus	discors	suspension	63	-65	Cumberland Sd., NU	Baffin Bay				1953			429		CAMS-57303			530	30	-73	30	0.3	63.2
	785	Old785	Labrador	Ethanol			Chlamys	islandica	suspension	62.66	-66.8	Watts Bay, NU	Baffin Bay				1952			192		GSC-1889			650	40	47	40	3.35	70.9
	786	Old786	NWBaffin	Ethanol			Portlandia	arctica	Deposit	72.45	-74.87	Cape Macculloch, NU	Baffin Bay				1894			-35	-35	GSC-3671			680	40	60	40	-0.4	76.5
	787	Old787	Labrador	Ethanol			Mya	truncata	suspension	66.15	-65.73	Pangnirtung, NU	Baffin Bay				1952			-96	-96	TO-5979			550	40	-53	40	1.3	71.3
	788	Old788	Labrador	Ethanol			Mya	truncata	suspension	66.15	-65.73	Pangnirtung, NU	Baffin Bay				1952			-96	-96	TO-8042			520	70	-83	70	-0.01	0
	789	Old789	NWBaffin	Ethanol			Musculus	discors	suspension	72.8	-77	Bylot Is., NU	Baffin Bay				1955			-989	-989	UCIAMS-6562			690	20	87	20	1.3	82.2
	790	Old790	Labrador	Ethanol			Musculus	discors	suspension	62.73	-65.48	Ct. Warwick Sd., NU	Baffin Bay				1951			-24	-24	UCIAMS-6563			650	20	47	20	1.97	63.2
	791	Old791	NEGreenland	Ethanol			Astarte	borealis	suspension	70.5	-22.5	Greenland	East Greenland				1933			-133	-133	TO-8059			410	60	-194	60	1.02	71.4
	836	Old836	Labrador	Ethanol			Mytilus	edulis	suspension	51.47	-57.25	Bradore Bay, QC	Gulf of St. Lawrence northern				1923			-3	-3	CAMS-34645			460	50	-144	50	1.78	17.8
	839	Old839	Labrador	Ethanol			Mytilus	edulis	suspension	51.47	-57.25	Bradore Basin, QC	Gulf of St. Lawrence northern				1923			-3	-3	GSC-6106			450	80	-154	80	0.64	17.8
	847	Old847	Labrador	Ethanol			Mytilus	edulis	suspension	51.46	-57.24	Bradore Bay, QC	Gulf of St. Lawrence northern				1923			6		UCIAMS-6026			595	20	-9	20	-1.88	17.8
	890	Old890	Labrador	Ethanol			Yoldia	hyperborea	Deposit	52	-56.07	Temple Bay, NF	Labrador				1923			333		CAMS-35488			680	50	76	50	0.67	26.9
	891	Old891	Labrador	Ethanol			Yoldia	hyperborea	Deposit	56.57	-61.63	Nain, Lbdr	Labrador				1955			-106	-106	CAMS-46756			570	40	-33	40	0.56	43
	892	Old892	Labrador	Ethanol			Serripes	groenlandicus	suspension	53.77	-56.92	Egg Hbr, Lbdr	Labrador				1908			12		CAMS-64243			620	40	12	40	0.8	30.1
	893	Old893	Labrador	Ethanol			Astarte	borealis	suspension	53.77	-56.92	Egg Hbr, Lbdr	Labrador				1908			12		CAMS-64244			560	40	-48	40	1.6	30.1
	894	Old894	Labrador	Ethanol			Clinocardium	ciliatum	suspension	53.77	-56.92	Egg Hbr, Lbdr	Labrador				1908			12		CAMS-64245			510	40	-98	40	1.5	30.1
	895	Old895	Labrador	Ethanol			Mya	arenaria	suspension	53.77	-56.92	Egg Hbr, Lbdr	Labrador				1908			12		CAMS-64246			680	40	72	40	1	30.1
	896	Old896	Labrador	Ethanol			Hiatella	arctica	suspension	58	-62	Cape Mugford, Lbdr	Labrador				1908			-180	-180	CAMS-64247			570	40	-38	40	2.2	45
	897	Old897	Labrador	Ethanol			Astarte	borealis	suspension	58.2	-62.63	Hebron, Lbdr	Labrador				1908			18		CAMS-64248			760	40	152	40	1.7	46
	898	Old898	Labrador	Ethanol			Hiatella	arctica	suspension	53.8	-56.43	Grady Hbr, Lbdr	Labrador				1908			10		CAMS-64249			520	40	-88	40	1.7	30.9
	899	Old899	Labrador	Ethanol			Serripes	groenlandicus	suspension	59.28	-63.73	Komaktorvik Fd, Lbdr	Labrador				1908			-72	-72	CAMS-64255			600	40	-8	40	-1.2	50.7
	900	Old900	Labrador	Ethanol			Chlamys	islandica	suspension	59.83	-64.13	Eclipse Hbr, Lbdr	Labrador				1908			-5	-5	CAMS-64256			620	30	12	30	1.6	51.4
	901	Old901	Labrador	Ethanol			Clinocardium	ciliatum	suspension	56.58	-61.58	Nain, Lbdr	Labrador				1908			-4	-4	CAMS-64257			550	40	-58	40	1.1	43
	902	Old902	Labrador	Ethanol			Astarte	borealis	suspension	56.53	-61.68	Nain, Lbdr	Labrador				1908			163		CAMS-64258			600	40	-8	40	1.6	43
	903	Old903	Labrador	Ethanol			Hiatella	arctica	suspension	56.58	-61.58	Nain, Lbdr	Labrador				1908			-4	-4	CAMS-64259			670	40	62	40	2.2	43
	904	Old904	Labrador	Ethanol			Astarte	borealis	suspension	56.58	-61.58	Nain, Lbdr	Labrador				1908			-4	-4	CAMS-64260			480	40	-128	40	1.6	43
	905	Old905	Labrador	Ethanol			Macoma	calcarea	Deposit	57.15	-61.35	Beachy Is., Lbdr	Labrador				1908			88		CAMS-64261			560	40	-48	40	0.3	41.9
	906	Old906	Labrador	Ethanol			Hiatella	arctica	suspension	56.53	-61.68	Nain, Lbdr	Labrador				1908			163		CAMS-64262			590	40	-18	40	1.1	43
	907	Old907	Labrador	Ethanol			Macoma	balthica	unknown	54.45	-57.22	Indian Hbr, Lbdr	Labrador				1908			40		CAMS-64263			510	40	-98	40	1	34.4
	908	Old908	Labrador	Ethanol			Macoma	balthica	unknown	51.37	-55.58	St. Anthony, NF	Labrador				1906			-4	-4	CAMS-64265			560	30	-49	30	1.6	25.3
	909	Old909	Labrador	Ethanol			Serripes	groenlandicus	suspension	53.77	-56.92	Egg Hbr, Lbdr	Labrador				1908			12		CAMS-65802			560	40	-48	40	-0.8	30.1
	910	Old910	Labrador	Ethanol			Clinocardium	ciliatum	suspension	58.35	-62.45	Fish Is., Lbdr	Labrador				1908			22		CAMS-65803			580	40	-28	40	0.12	46
	911	Old911	Labrador	Ethanol			Clinocardium	ciliatum	suspension	57.15	-61.35	Beachy Is., Lbdr	Labrador				1908			88		CAMS-65804			540	30	-68	30	1.03	41.9
	912	Old912	Labrador	Ethanol			Serripes	groenlandicus	suspension	53.77	-56.92	Egg Hbr, Lbdr	Labrador				1908			12		CAMS-65806			580	40	-28	40	1.44
	913	Old913	Labrador	Ethanol			Macoma	calcarea	Deposit	58.35	-62.45	Fish Is., Lbdr	Labrador				1908			22		CAMS-65807			680	40	72	40	0.66	46
	914	Old914	Labrador	Ethanol			Mya	arenaria	suspension	56.53	-61.68	Nain, Lbdr	Labrador				1908			163		CAMS-65808			650	40	42	40	1	0
	915	Old915	Labrador	Ethanol			Astarte	borealis	suspension	58.2	-62.63	Hebron, Lbdr	Labrador				1908			18		UCIAMS-6575			685	20	77	20	1.7	46
	961	Old961	Labrador	Ethanol			Mya	truncata	suspension	60.41	-64.83	Port Burwell, NU	Ungava Bay				1948			-29	-29	CAMS-33148			630	50	27	50	2.63	61.3
	964	Old964	Labrador	Ethanol			Musculus	discors	suspension	60.63	-64.65	Button Is., NU	Ungava Bay				1950			71		CAMS-46554			520	40	-83	40	2.59	55.4
	969	Old969	Labrador	Ethanol			Mytilus	edulis	suspension	60.37	-64.78	Forbes Sound, NU	Ungava Bay				1949			1		TO-8021			740	60	137	60	0.81	61.3
	970	Old970	Labrador	Ethanol			Musculus	niger	suspension	60.4	-64.87	Forbes Sound, NU	Ungava Bay				1949			-113	-113	TO-8022			570	60	-33	60	2.01	59.5
	971	Old971	Labrador	Ethanol			Cyclocardia	borealis	suspension	60.35	-64.97	Cap William-Smith, NU	Ungava Bay				1949			-153	-153	TO-8023			600	50	-3	50	2.97	59.5
	972	Old972	Labrador	Ethanol			Hiatella	arctica	suspension	60.4	-64.97	Jackson Is., NU	Ungava Bay				1949			-274	-274	TO-8034			520	50	-83	50	2.39	59.5
	974	Old974	Labrador	Ethanol			Yoldia	limatula	Deposit	60.42	-64.83	Port Burwell, NU	Ungava Bay				1904			-9	-9	TO-8060			560	60	-51	60	0.79	61.3
	976	Old976	Labrador	Ethanol			Cyclocardia	borealis	suspension	60.35	-64.97	Cap William-Smith, NU	Ungava Bay				1949			-153	-153	UCIAMS-6018			595	20	-8	20	2.97	59.5
	977	Old977	Labrador	Ethanol			Astarte	borealis	suspension	60.42	-64.83	Port Burwell, NU	Ungava Bay				1904			-9	-9	UCIAMS-6021			750	20	139	20	1.54	61.3
	980	Old980	Labrador	Ethanol			Macoma	calcarea	Deposit	60.42	-64.83	Port Burwell, NU	Ungava Bay				1904			-9	-9	UCIAMS-6566			720	20	109	20	0.13	61.3
	981	Old981	Labrador	Ethanol			Astarte	borealis	suspension	60.42	-64.83	Port Burwell, NU	Ungava Bay				1904			-9	-9	UCIAMS-6569			765	20	154	20	1.54	61.3
	984	Old984	Labrador	Ethanol			Hiatella	arctica	suspension	60.63	-64.65	Button Is., NU	Ungava Bay				1950			71		UCIAMS-6573			560	20	-43	20	1.91	55.4
	986	Old986	NWGreenland	Ethanol			Macoma	calcarea	Deposit	71.35	-54.48	Nuussuaq, Greenland	West Greenland				1928			-64	-64	CAMS-33150			660	50	56	50	0.72	46.9
	987	Old987	NWGreenland	Ethanol			Astarte	montagui	suspension	69	-52	Disko, Greenland	West Greenland				1935			-286	-286	CAMS-57305			720	40	116	40	1.1	36.8
	988	Old988	NWGreenland	Ethanol			Mytilus	edulis	suspension	76.56	-68.92	Umanaq, Greenland	West Greenland				1940			-46	-46	GSC-2316			450	60	-153	60	-0.15	71.6
	989	Old989	NWGreenland	Ethanol			Macoma	calcarea	Deposit	71.35	-54.48	Nuussuaq, Greenland	West Greenland				1928			-64	-64	UCIAMS-6560			580	20	-24	20	0.72	46.9
	990	Old990	NWGreenland	Ethanol			Astarte	montagui	suspension	69	-52	Disko, Greenland	West Greenland				1935			-286	-286	UCIAMS-6561			600	25	-4	25	1.1	36.8
