# Supplementary figures and images for: The marine reservoir age of Greenland coastal waters
Source: Copernicus journal article supplement (doi:10.5194/gchron-2023-7), 2023-04-17

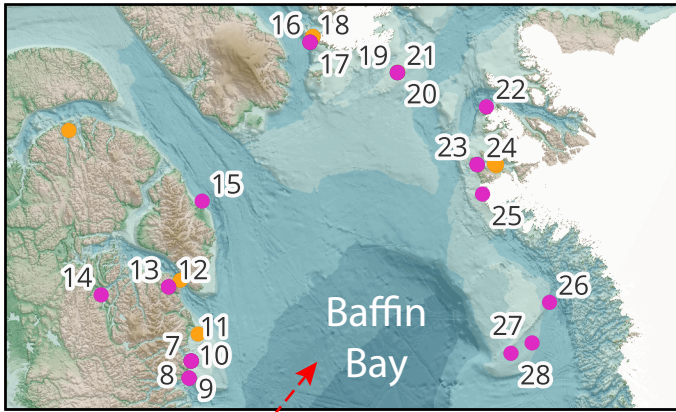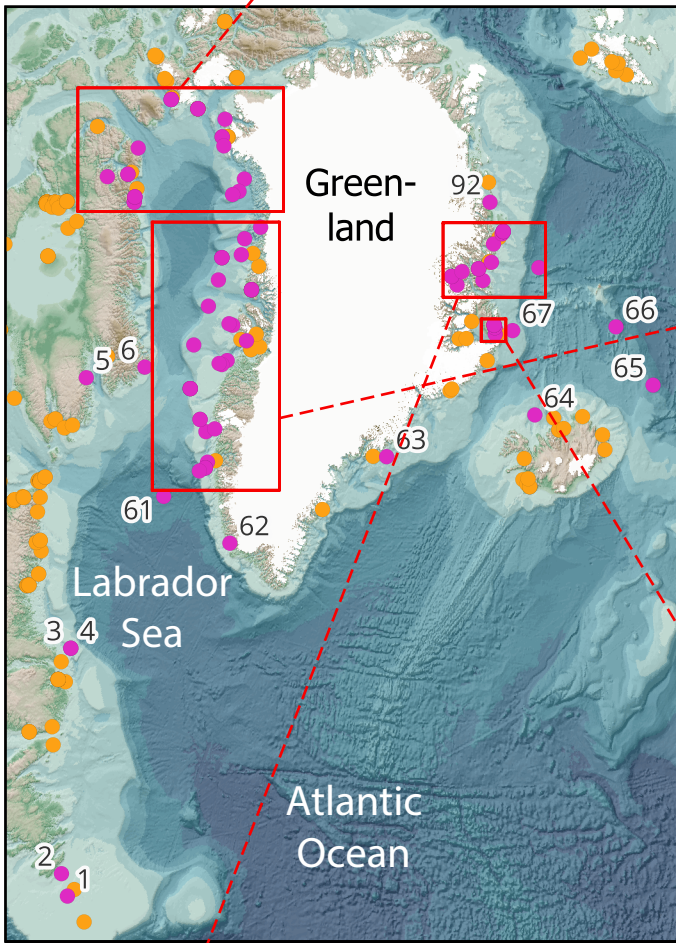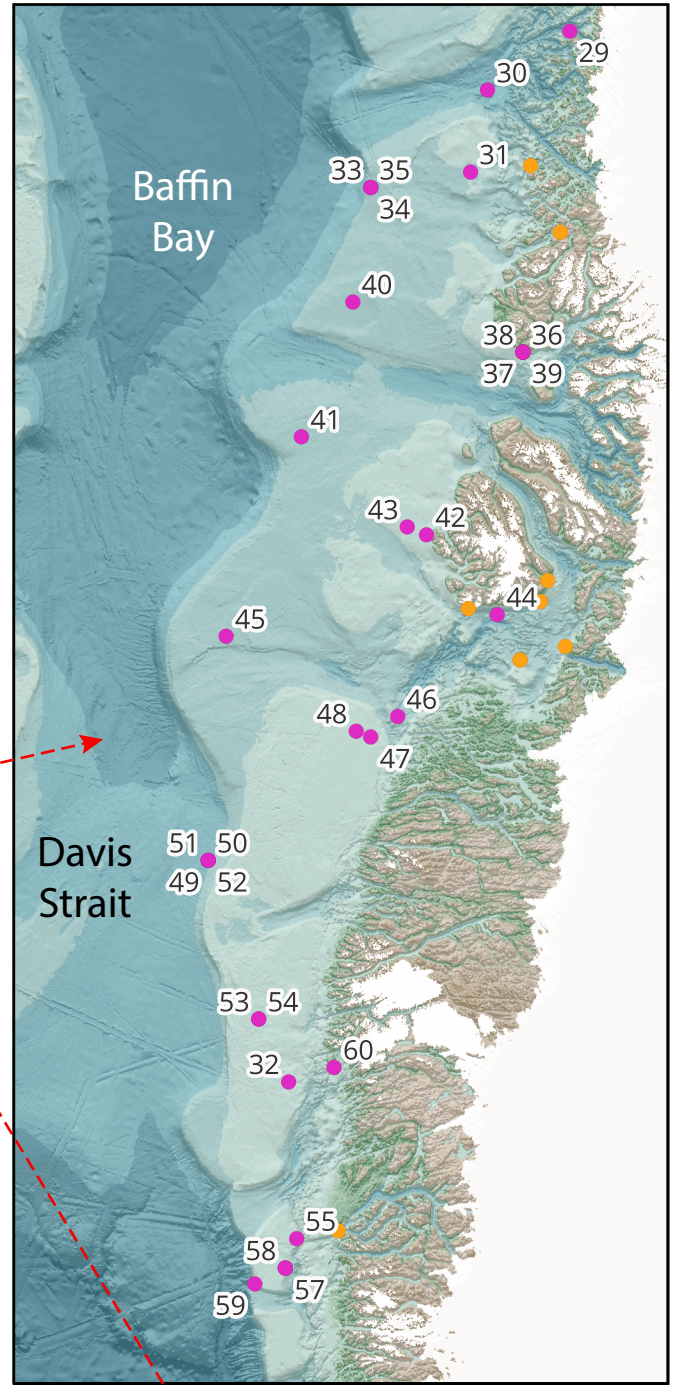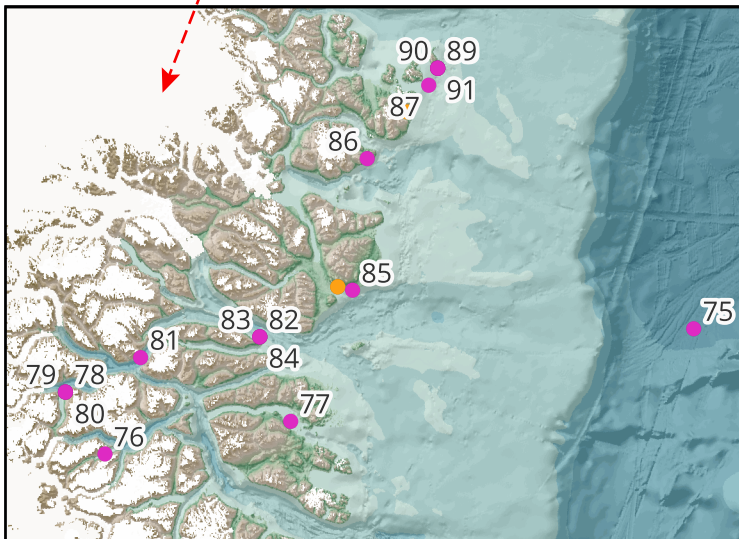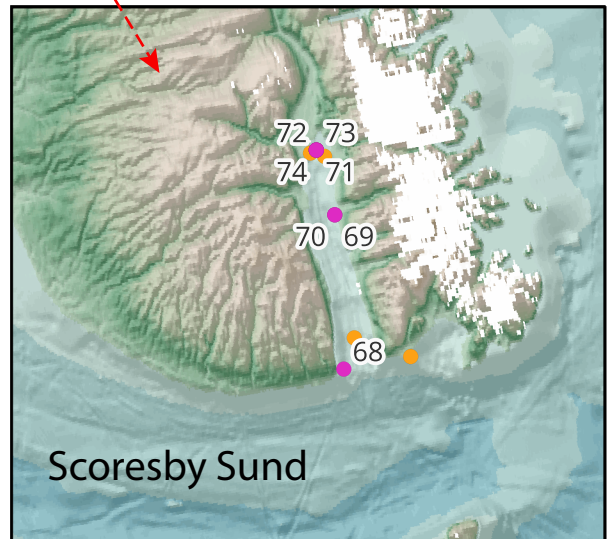

Supplement: Supplementary file 1 [file Suppl. Fig. 1 - Map with all sample numbers.pdf › Suppl. Fig. 1 - Map with all sample numbers.pdf]

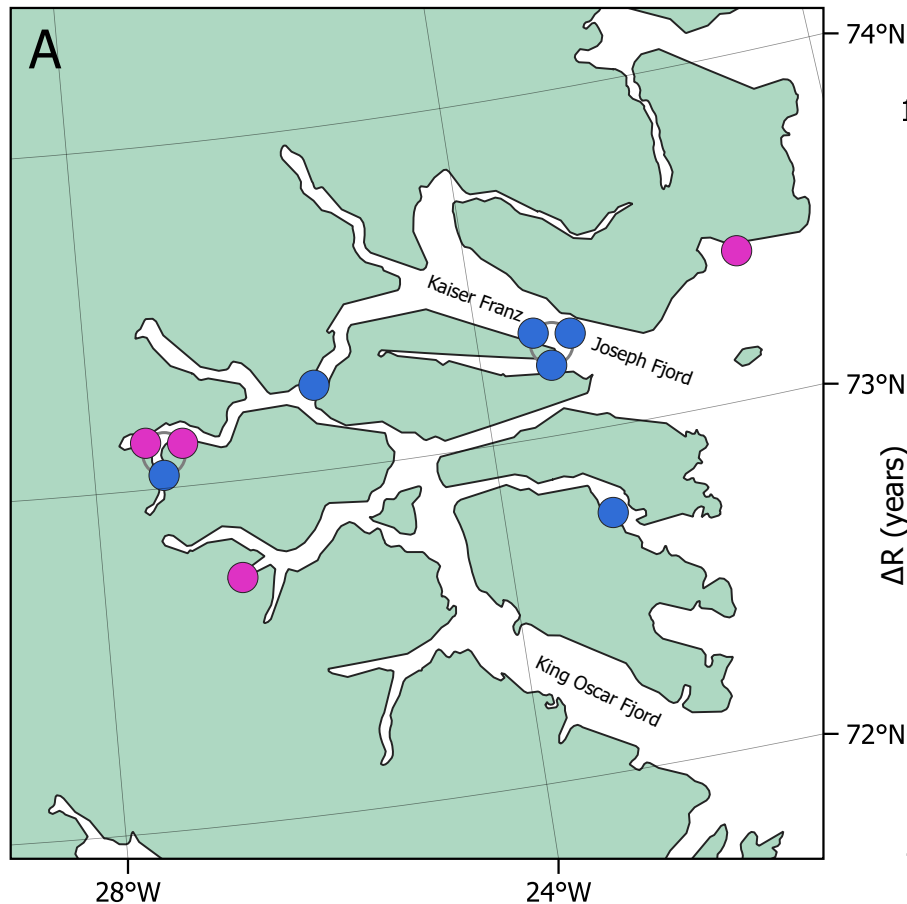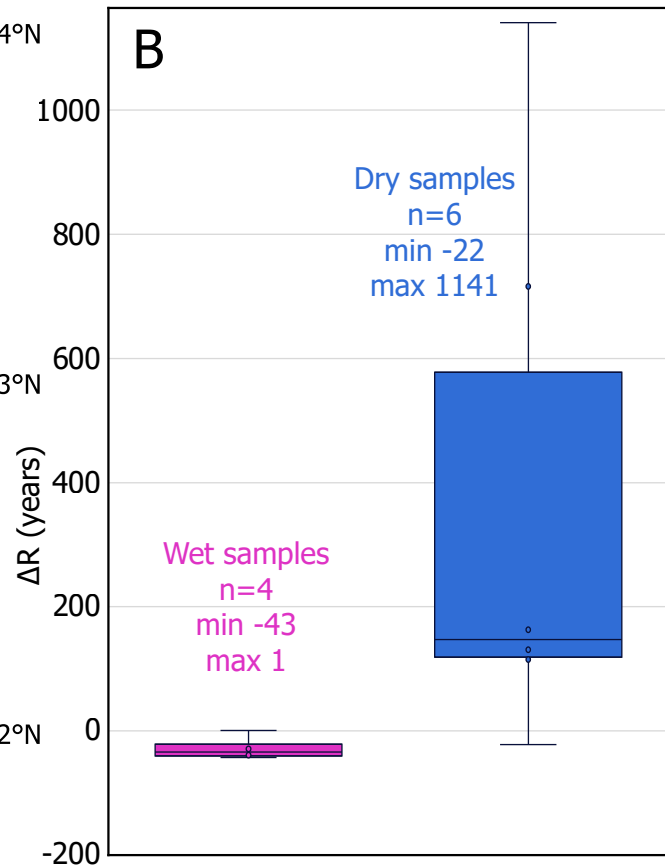

Supplement: Supplementary file 2 [file Suppl. Fig. 2 - Wet vs Dry collections.pdf › Suppl. Fig. 2 - Wet vs Dry collections.pdf]
